# Supplementary material for: iPSC-Derived Endothelial Cells Reveals LDLR-Dysfunction and Dysregulated Gene Expression Profiles in Familial Hypercholesterolemia
Source: Preprints.org preprint supplement (doi:10.20944/preprints202311.0526.v1), 2023-11-08
Supplement: Supplementary file 1 [file supplementary]

## Sheet: Лист1
ENSEMBL	SYMBOL	GENENAME	logFC	adj.P.Val	FH_TPM_AVE	CTRL_TPM_AVE	FH131_TPM_AVE	FH328_TPM_AVE	K64_TPM_AVE	K74_TPM_AVE
ENSG00000214548	MEG3	maternally expressed 3	-7.16732	0.00517943	0.338	42.54	0.49	0.186	24.06	61.02
ENSG00000225746	MEG8	maternally expressed 8	-6.79161	2.81629e-10	0	3.133	0	0	2.688	3.578
ENSG00000171564	FGB	fibrinogen beta chain	-5.911	0.000912273	0.063	3.296	0.061	0.065	1.961	4.632
ENSG00000223403	MIR381HG	MIR381 host gene	-5.0939	0.0126014	0.035	1.207	0.071	0	0.835	1.579
ENSG00000250658	HSALNG0039225	long intergenic non-protein coding RNA RP11-138B4.1	-4.4618	0.0377473	0.024	0.717	0	0.047	1.039	0.394
ENSG00000179344	HLA-DQB1	major histocompatibility complex, class II, DQ beta 1	-4.15145	0.0398901	0.21	1.554	0.136	0.285	2.063	1.046
ENSG00000127472	PLA2G5	phospholipase A2 group V	-3.87025	0.0457308	0.374	5.052	0.16	0.589	6.306	3.799
ENSG00000267323	SLC25A1P5	solute carrier family 25 member 1 pseudogene 5	-3.79934	0.000156231	0	0.738	0	0	0.705	0.772
ENSG00000168952	STXBP6	syntaxin binding protein 6	-3.64658	0.005389	0.454	5.202	0.55	0.358	4.075	6.329
ENSG00000137573	SULF1	sulfatase 1	-3.54462	0.0240435	9.656	105.649	5.34	13.971	75.638	135.659
ENSG00000231689	LINC01090	long intergenic non-protein coding RNA 1090	-3.47747	0.0425165	0.015	1.17	0	0.029	1.612	0.728
ENSG00000189334	S100A14	S100 calcium binding protein A14	-3.45664	0.00809827	0.011	0.596	0	0.022	0.628	0.563
ENSG00000127074	RGS13	regulator of G protein signaling 13	-3.3407	0.0063651	0	0.378	0	0	0.578	0.179
ENSG00000230438	SERPINB9P1	serpin family B member 9 pseudogene 1	-3.32913	0.000504429	0.682	6.544	0.878	0.486	7.469	5.618
ENSG00000152583	SPARCL1	SPARC like 1	-3.32852	0.000704129	0.315	1.603	0.478	0.152	1.874	1.331
ENSG00000108932	SLC16A6	solute carrier family 16 member 6	-3.32641	0.0033774	0.287	1.939	0.328	0.246	1.886	1.992
ENSG00000124467	PSG8	pregnancy specific beta-1-glycoprotein 8	-3.18101	0.0425165	0	0.202	0	0	0.101	0.304
ENSG00000196329	GIMAP5	GTPase, IMAP family member 5	-3.06231	0.001919	3.165	26.106	2.145	4.186	28.413	23.798
ENSG00000087258	GNAO1	G protein subunit alpha o1	-2.99048	0.00153882	0.402	1.62	0.627	0.177	1.379	1.86
ENSG00000119922	IFIT2	interferon induced protein with tetratricopeptide repeats 2	-2.96059	0.000129402	1.108	8.481	0.894	1.321	8.018	8.943
ENSG00000172716	SLFN11	schlafen family member 11	-2.77753	0.0122369	0.488	2.936	0.285	0.69	3.689	2.183
ENSG00000144619	CNTN4	contactin 4	-2.65918	0.000504429	0.765	3.447	0.657	0.873	3.712	3.182
ENSG00000170425	ADORA2B	adenosine A2b receptor	-2.30579	0.00483974	3.657	17.898	3.052	4.262	20.526	15.269
ENSG00000125257	ABCC4	ATP binding cassette subfamily C member 4	-2.20691	0.00650056	2.014	8.608	1.705	2.324	9.84	7.376
ENSG00000182179	UBA7	ubiquitin like modifier activating enzyme 7	-2.20343	0.00179503	2.69	10.762	3.217	2.162	10.137	11.387
ENSG00000112902	SEMA5A	semaphorin 5A	-1.60916	0.00809827	4.499	13.921	4.554	4.445	14.748	13.093
ENSG00000013016	EHD3	EH domain containing 3	1.22629	0.0377473	121.896	52.136	121.078	122.714	50.542	53.731
ENSG00000198053	SIRPA	signal regulatory protein alpha	1.52138	0.0033774	31.828	11.073	33.434	30.222	10.561	11.586
ENSG00000099617	EFNA2	ephrin A2	1.52286	0.0119322	7.793	2.716	7.628	7.957	2.684	2.747
ENSG00000188158	NHS	NHS actin remodeling regulator	1.81955	0.00517943	6.272	2.073	6.358	6.187	2.35	1.796
ENSG00000128709	HOXD9	homeobox D9	2.14506	0.0051027	12.911	2.924	14.299	11.522	3.418	2.43
ENSG00000158125	XDH	xanthine dehydrogenase	2.17524	0.000504429	2.943	0.653	3.059	2.827	0.745	0.56
ENSG00000132718	SYT11	synaptotagmin 11	2.27088	0.000504429	5.462	1.141	5.273	5.651	1.381	0.901
ENSG00000187773	DIPK1C	divergent protein kinase domain 1C	2.45155	0.0122369	4.306	0.638	3.294	5.318	0.716	0.56
ENSG00000143195	ILDR2	immunoglobulin like domain containing receptor 2	2.75065	1.89957e-05	6.546	0.904	7.402	5.69	0.79	1.017
ENSG00000142549	IGLON5	IgLON family member 5	3.81632	0.00153882	11.026	0.758	7.927	14.125	0.696	0.82
ENSG00000287069	HSALNG0024559	novel transcript, antisense to KCNH8	3.89978	0.0416338	0.711	0.049	0.484	0.939	0.058	0.04
ENSG00000223511	LINC02968	long intergenic non-protein coding RNA 2968	3.97521	0.0199716	3.649	0.118	4.869	2.43	0.176	0.061
ENSG00000204792	LINC01291	long intergenic non-protein coding RNA 1291	5.84397	0.00029932	1.043	0.01	1.404	0.683	0.015	0.005
